# Supplementary material for: Low-temperature activation of methane on doped single atoms: descriptor and prediction
Source: Royal Society of Chemistry journal article supplement (doi:10.1039/c8cp03191f), 2018-01-01
Supplement: c8cp03191f1.pdf [file c8cp03191f1.pdf]

*Electronic Supplementary Information for:*

# Low-temperature activation of methane on doped single atoms: descriptor and prediction

Victor Fung,<sup>1</sup> Franklin (Feng) Tao,<sup>2\*</sup> De-en Jiang<sup>1\*</sup>

<sup>1</sup>Department of Chemistry, University of California, Riverside, CA 92521, USA

<sup>2</sup>Department of Chemical and Petroleum Engineering and Department of Chemistry, University  
of Kansas, Lawrence, KS 66045, USA

## Corresponding Authors

\*E-mail: [djiang@ucr.edu](mailto:djiang@ucr.edu); [franklin.feng.tao@ku.edu](mailto:franklin.feng.tao@ku.edu)

## 1. Supporting Figures

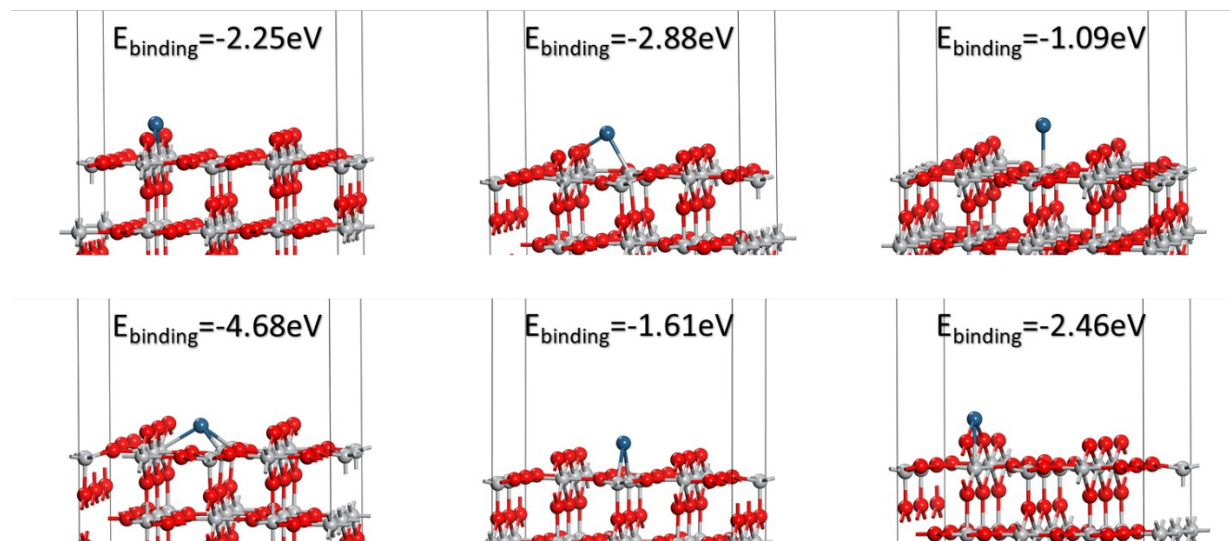

**Fig. S1.** Binding energies of Pt (blue) on oxygen vacancy (top left) and pristine (the rest) TiO<sub>2</sub> surfaces. Ti, grey; O, red.

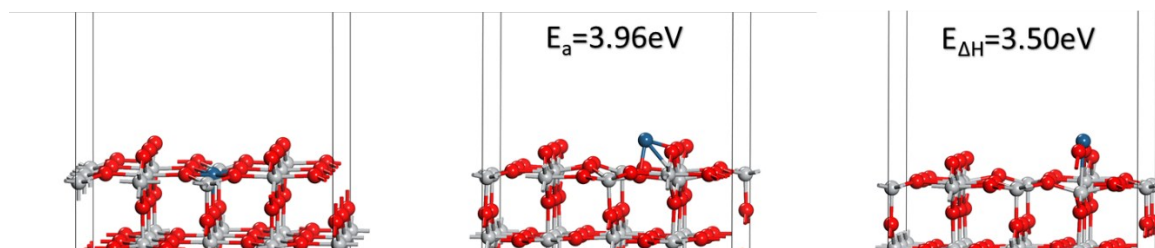

**Fig. S2.** Barrier and reaction energy of diffusion of Pt (blue) out of the cationic vacancy site: left, initial state; middle, transition state; right, final state. Ti, grey; O, red.

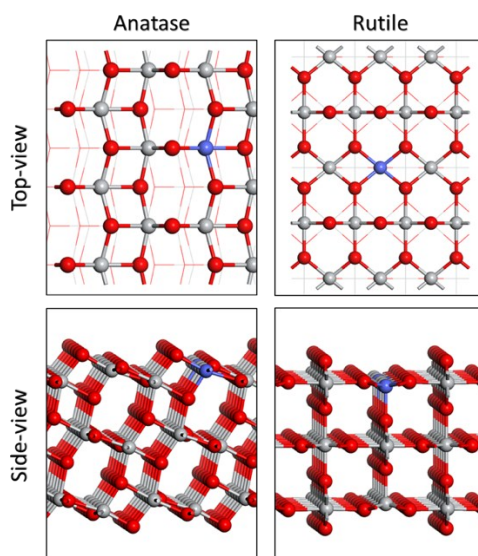

**Fig. S3.** Comparison of the surface doping site (highlighted in blue) on anatase (101) and rutile (110)  $\text{TiO}_2$ . Ti, grey; O, red.

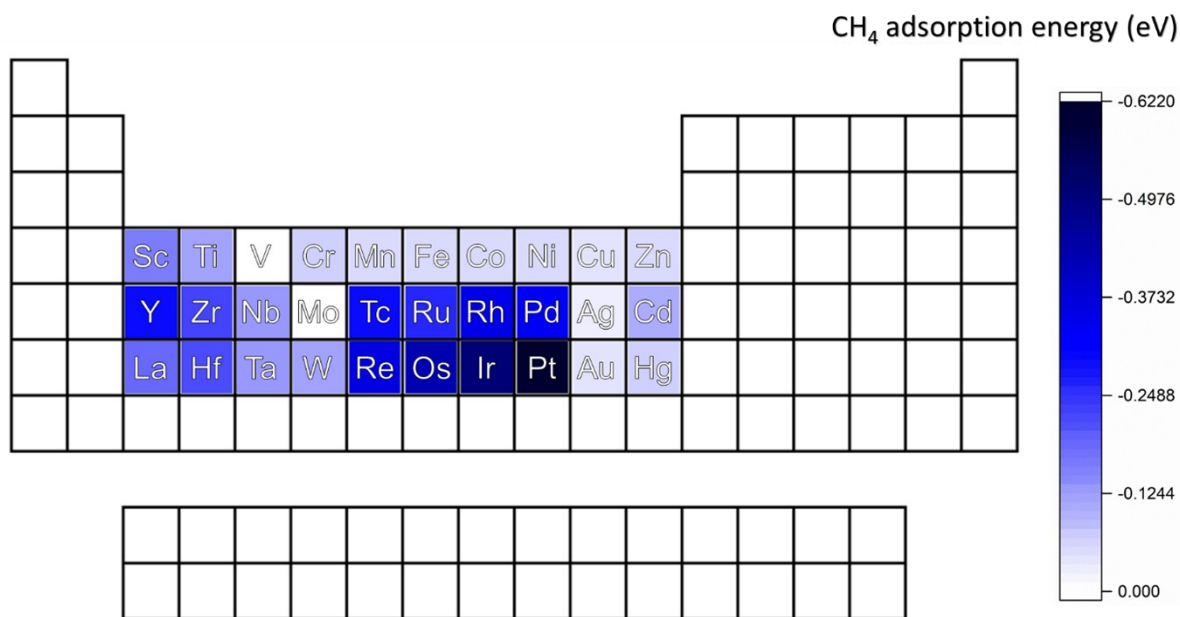

**Fig. S4.** Heat map representing methane adsorption energies for each transition-metal single-atom site on rutile TiO<sub>2</sub> (110). Darker color indicates stronger adsorption.

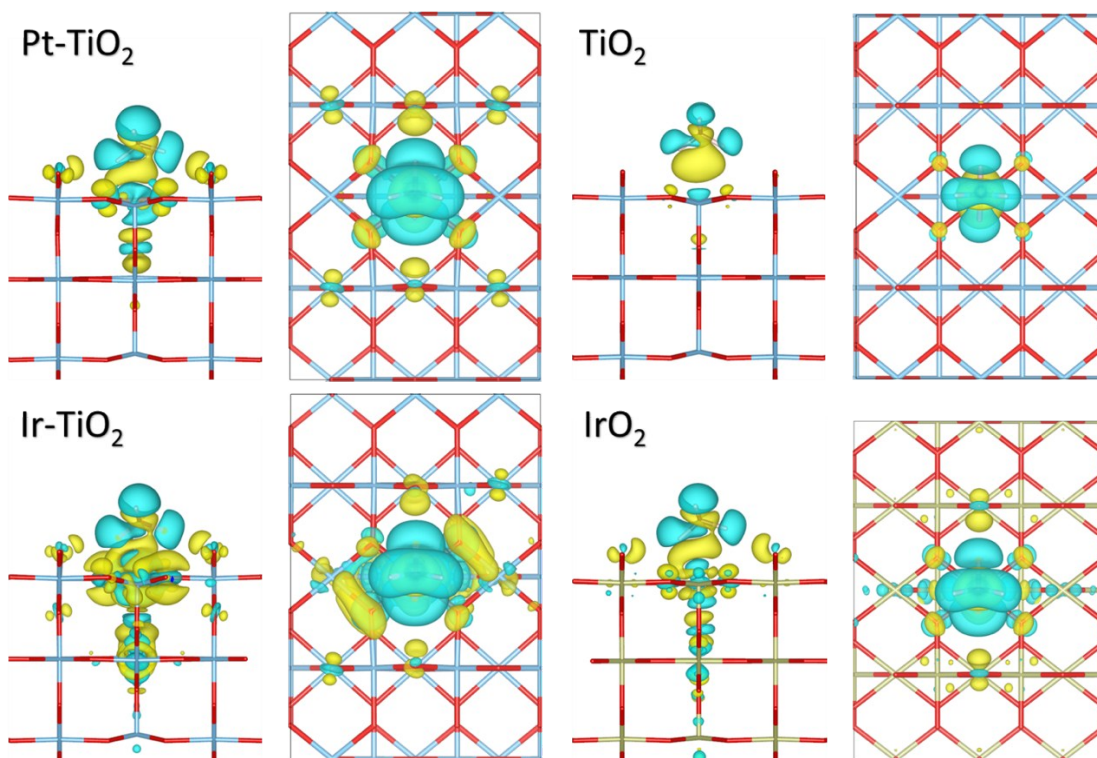

**Fig. S5.** Side and top-views of the isosurface plot of the charge density difference for CH<sub>4</sub> adsorption on rutile Pt<sub>1</sub>-TiO<sub>2</sub>, Ir<sub>1</sub>-TiO<sub>2</sub>, IrO<sub>2</sub>, and TiO<sub>2</sub> (110) surfaces.

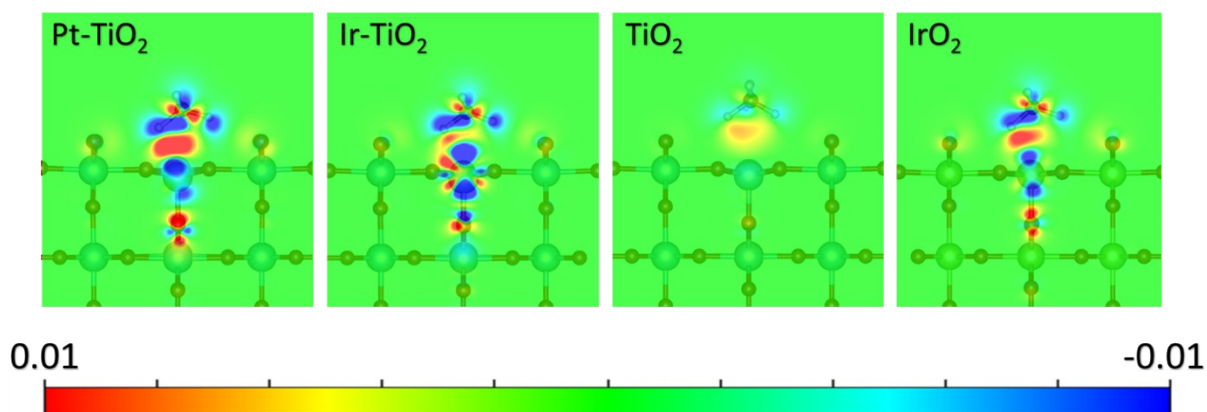

**Fig. S6.** Side views of the 2-D charge density plot on the  $H_a-C-H_b$  plane with charge depletion in blue and charge accumulation in red for  $CH_4$  adsorption on rutile on rutile  $Pt_1-TiO_2$ ,  $Ir_1-TiO_2$ ,  $IrO_2$ , and  $TiO_2$  (110) surfaces.

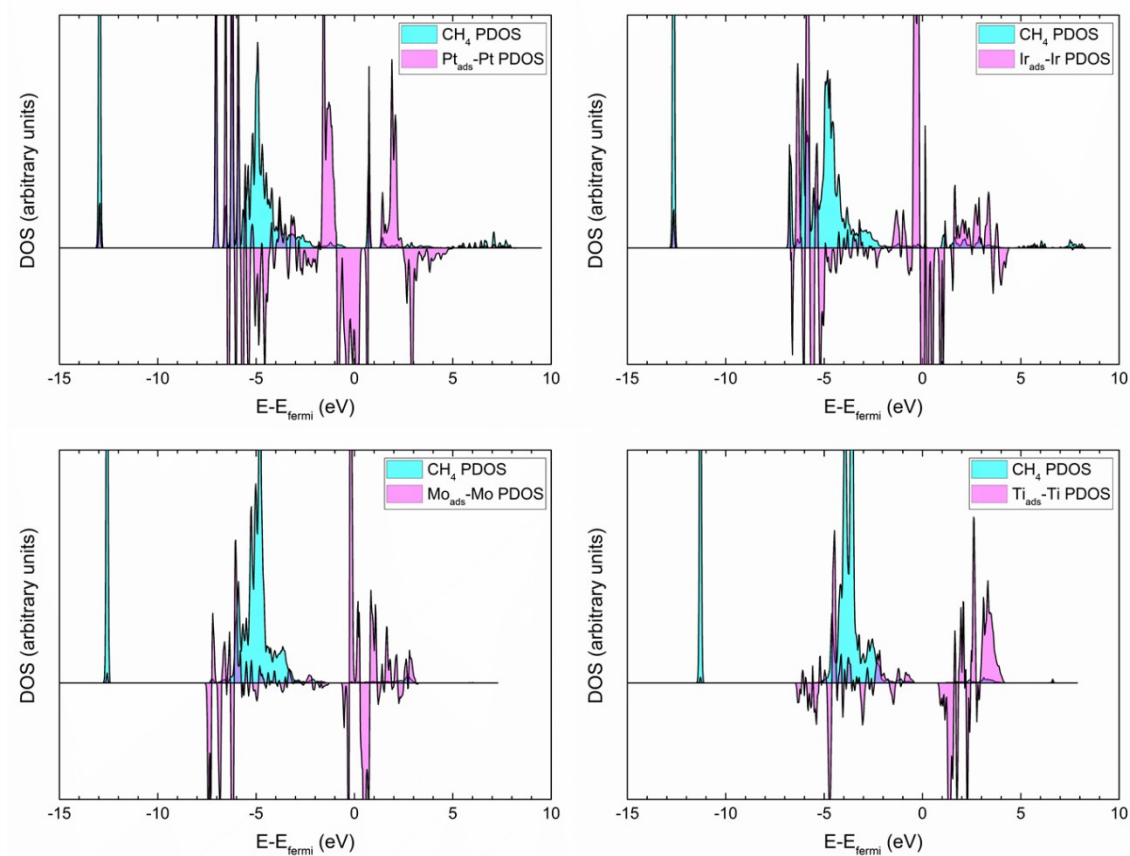

**Fig. S7.** Local density of states of the adsorbed  $CH_4$  and single-atom sites for  $Pt_1$ ,  $Ir_1$ , and  $Mo_1$  on rutile  $TiO_2(110)$ , in comparison with the undoped rutile  $TiO_2(110)$ .

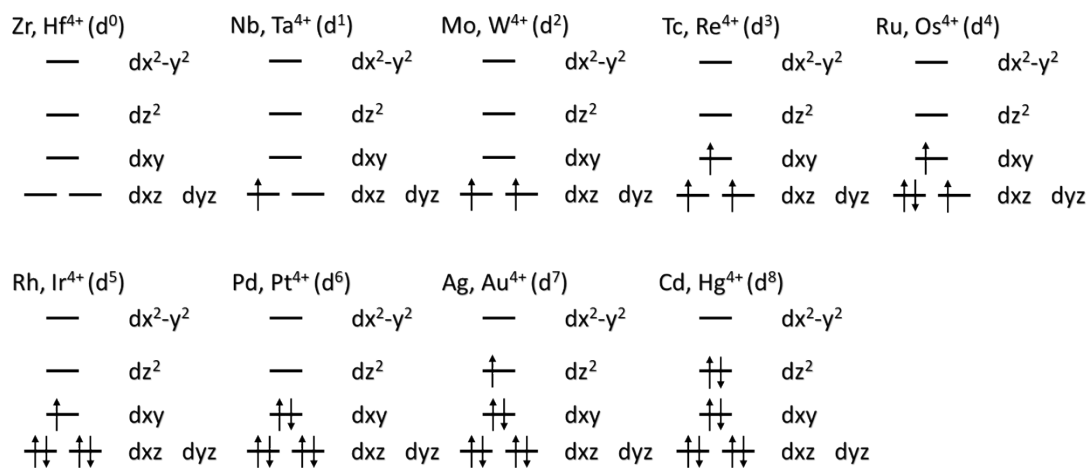

**Fig. S8.** Diagram of most plausible d-orbital occupations of the 4-d and 5-d transition metal single atoms on rutile TiO<sub>2</sub>(110), based on the 4+ oxidation state and computationally obtained electron magnetic moments for the single atoms.

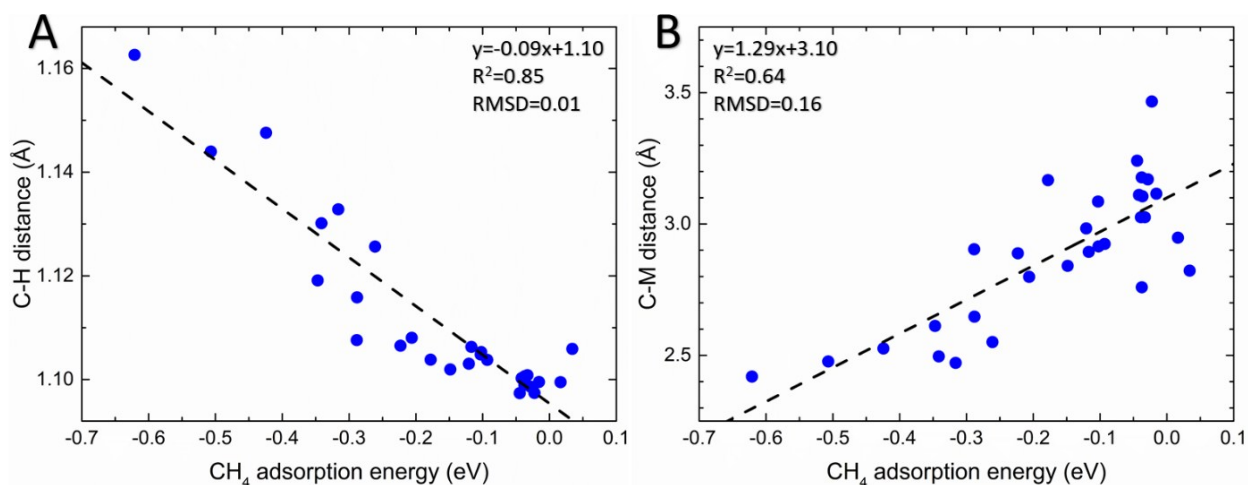

**Fig. S9.** CH<sub>4</sub> adsorption on the M<sub>1</sub> (single atom) site on rutile TiO<sub>2</sub> (110) for M being various transition metals: **(A)** Correlation between C-H<sub>a</sub> bond distance and CH<sub>4</sub> adsorption energy; **(B)** Correlation between C-M<sub>1</sub> distance and CH<sub>4</sub> adsorption energy. See Table S3 for the specifics of all data points.

## 2. Supporting Tables

**Table S1.** Binding energies of the dopant atoms into the cationic vacancy of TiO<sub>2</sub>.

| Dopant | E <sub>binding</sub> (eV) |
|--------|---------------------------|
| Ti     | -18.63                    |
| Ru     | -15.64                    |
| Rh     | -14.15                    |
| Pd     | -10.99                    |
| Os     | -16.64                    |
| Ir     | -15.15                    |
| Pt     | -12.95                    |

**Table S2.** Comparison of CH<sub>4</sub> adsorption energies on the M<sub>1</sub> single-atom site on TiO<sub>2</sub> anatase (101) and rutile (110).

| M <sub>1</sub> | CH <sub>4</sub> ads. (eV) |        |
|----------------|---------------------------|--------|
|                | Anatase                   | Rutile |
| Fe             | -0.02                     | -0.04  |
| Co             | 0.00                      | -0.04  |
| Ni             | -0.02                     | -0.03  |
| Ru             | -0.14                     | -0.26  |
| Rh             | -0.18                     | -0.34  |
| Pd             | -0.08                     | -0.32  |
| Os             | -0.21                     | -0.42  |
| Ir             | -0.31                     | -0.51  |
| Pt             | -0.18                     | -0.62  |

**Table S3.** Energetic and geometric parameters of methane adsorption on the M<sub>1</sub> single-atom site on rutile TiO<sub>2</sub>(110).

| M <sub>1</sub>  | CH <sub>4</sub><br>ads. E<br>(eV) | C-M dis.<br>(Å) | O-H <sub>a</sub> dis.<br>(Å) | O-H <sub>b</sub> dis.<br>(Å) | C-H <sub>a</sub> dis.<br>(Å) | C-H <sub>b</sub> dis.<br>(Å) | C-H<br>diss. E<br>(eV) | C-H act.<br>E (eV) | Apparent<br>act. E<br>(eV) |
|-----------------|-----------------------------------|-----------------|------------------------------|------------------------------|------------------------------|------------------------------|------------------------|--------------------|----------------------------|
| Sc              | -0.15                             | 2.841           | 2.577                        | 2.551                        | 1.102                        | 1.106                        | -0.44                  |                    |                            |
| Ti<br>(undoped) | -0.10                             | 2.915           | 2.650                        | 2.492                        | 1.105                        | 1.102                        | -0.02                  | 0.87               | 0.76                       |
| V               | 0.02                              | 2.948           | 2.620                        | 2.458                        | 1.099                        | 1.097                        | 0.00                   | 0.96               | 0.97                       |
| Cr              | -0.04                             | 3.111           | 2.662                        | 2.563                        | 1.100                        | 1.101                        | -0.37                  | 0.81               | 0.77                       |
| Mn              | -0.04                             | 2.759           | 2.591                        | 2.388                        | 1.100                        | 1.107                        | -1.08                  | 0.52               | 0.48                       |
| Fe              | -0.04                             | 3.106           | 2.723                        | 2.640                        | 1.101                        | 1.098                        | -0.35                  | 1.06               | 1.03                       |
| Co              | -0.04                             | 3.177           | 2.740                        | 2.644                        | 1.099                        | 1.100                        | -1.21                  | 0.74               | 0.70                       |
| Ni              | -0.03                             | 3.026           | 2.702                        | 2.591                        | 1.101                        | 1.098                        | -1.82                  | 0.52               | 0.49                       |
| Cu              | -0.03                             | 3.170           | 2.817                        | 2.866                        | 1.099                        | 1.101                        | -1.03                  |                    |                            |
| Zn              | -0.04                             | 3.026           | 2.713                        | 2.691                        | 1.100                        | 1.103                        | -0.56                  |                    |                            |
| Y               | -0.29                             | 2.904           | 2.772                        | 2.596                        | 1.108                        | 1.105                        | -0.47                  |                    |                            |
| Zr              | -0.22                             | 2.888           | 2.602                        | 2.515                        | 1.107                        | 1.106                        | 0.22                   | 0.80               | 0.58                       |
| Nb              | -0.12                             | 2.983           | 2.622                        | 2.557                        | 1.103                        | 1.102                        | -0.12                  | 0.88               | 0.76                       |
| Mo              | 0.03                              | 2.822           | 2.557                        | 2.474                        | 1.106                        | 1.106                        | -0.36                  | 0.69               | 0.72                       |
| Tc              | -0.29                             | 2.647           | 2.520                        | 2.375                        | 1.116                        | 1.105                        | -0.83                  | 0.51               | 0.22                       |
| Ru              | -0.26                             | 2.551           | 2.546                        | 2.310                        | 1.126                        | 1.101                        | -1.23                  | 0.38               | 0.12                       |
| Rh              | -0.34                             | 2.496           | 2.538                        | 2.277                        | 1.130                        | 1.102                        | -1.60                  | 0.27               | -0.07                      |
| Pd              | -0.32                             | 2.471           | 2.527                        | 2.275                        | 1.133                        | 1.103                        | -2.28                  | 0.13               | -0.18                      |
| Ag              | -0.02                             | 3.115           | 2.907                        | 2.860                        | 1.100                        | 1.103                        | -0.88                  |                    |                            |
| Cd              | -0.09                             | 2.924           | 2.852                        | 2.786                        | 1.104                        | 1.102                        | -0.42                  |                    |                            |
| La              | -0.18                             | 3.167           | 3.270                        | 3.161                        | 1.104                        | 1.101                        | -0.36                  |                    |                            |
| Hf              | -0.21                             | 2.799           | 2.531                        | 2.463                        | 1.108                        | 1.108                        | 0.26                   | 0.80               | 0.60                       |
| Ta              | -0.12                             | 2.894           | 2.583                        | 2.515                        | 1.106                        | 1.104                        | -0.23                  | 0.78               | 0.66                       |
| W               | -0.10                             | 3.085           | 2.689                        | 2.605                        | 1.105                        | 1.101                        | -0.49                  | 0.70               | 0.59                       |
| Re              | -0.35                             | 2.612           | 2.522                        | 2.334                        | 1.119                        | 1.107                        | -0.83                  | 0.47               | 0.12                       |
| Os              | -0.42                             | 2.526           | 2.568                        | 2.277                        | 1.148                        | 1.099                        | -1.24                  | 0.37               | -0.05                      |
| Ir              | -0.51                             | 2.477           | 2.524                        | 2.269                        | 1.144                        | 1.100                        | -1.63                  | 0.23               | -0.27                      |
| Pt              | -0.62                             | 2.419           | 2.535                        | 2.212                        | 1.163                        | 1.100                        | -2.24                  | 0.15               | -0.47                      |
| Au              | -0.02                             | 3.466           | 3.185                        | 3.093                        | 1.097                        | 1.099                        | -0.93                  |                    |                            |
| Hg              | -0.04                             | 3.241           | 3.028                        | 2.968                        | 1.097                        | 1.101                        | -0.34                  |                    |                            |

**Table S4.** Adsorption energy of methane to some isolated, neutral gas-phase metal single atoms.

| Atom | $E_{\text{adsorption}}(\text{eV})$ |
|------|------------------------------------|
| Os   | -0.11                              |
| Ir   | -0.23                              |
| Pt   | -0.13                              |
| Au   | -0.01                              |

**Table S5.** Bader charges (in |e|) prior to and after adsorption of  $\text{CH}_4$  on rutile  $\text{IrO}_2(110)$ ,  $\text{TiO}_2(110)$ , and  $\text{Ir}_1\text{-TiO}_2(110)$ , and  $\text{Pt}_1\text{-TiO}_2(110)$ .

| <b>Pre-adsorption</b>      | $M_1$  | $O_a$  | $O_b$  | C      | $H_a$ | $H_b$ |
|----------------------------|--------|--------|--------|--------|-------|-------|
| $\text{CH}_4$              |        |        |        | -0.064 | 0.016 | 0.016 |
| Rutile $\text{IrO}_2$      | 1.459  | -0.707 | -0.707 |        |       |       |
| Rutile $\text{TiO}_2$      | 2.026  | -0.906 | -0.906 |        |       |       |
| $\text{Ir}_1\text{-TiO}_2$ | 1.599  | -0.904 | -0.904 |        |       |       |
| $\text{Pt}_1\text{-TiO}_2$ | 1.453  | -0.904 | -0.904 |        |       |       |
| <b>Post-adsorption</b>     |        |        |        |        |       |       |
| Rutile $\text{IrO}_2$      | 1.465  | -0.731 | -0.733 | -0.200 | 0.026 | 0.135 |
| Rutile $\text{TiO}_2$      | 2.033  | -0.918 | -0.920 | -0.151 | 0.030 | 0.070 |
| $\text{Ir}_1\text{-TiO}_2$ | 1.558  | -0.929 | -0.931 | -0.246 | 0.064 | 0.163 |
| $\text{Pt}_1\text{-TiO}_2$ | 1.421  | -0.933 | -0.937 | -0.222 | 0.073 | 0.204 |
| <b>Difference</b>          |        |        |        |        |       |       |
| Rutile $\text{IrO}_2$      | 0.006  | -0.024 | -0.026 | -0.136 | 0.010 | 0.119 |
| Rutile $\text{TiO}_2$      | 0.006  | -0.012 | -0.015 | -0.087 | 0.014 | 0.054 |
| $\text{Ir}_1\text{-TiO}_2$ | -0.041 | -0.025 | -0.027 | -0.182 | 0.048 | 0.147 |
| $\text{Pt}_1\text{-TiO}_2$ | -0.032 | -0.029 | -0.033 | -0.158 | 0.057 | 0.188 |



**Table S6.** Comparison of methane adsorption energy ( $E_{\text{ads}}$ ), activation-energy ( $E_{\text{a}}$ ), and dissociation energy ( $\Delta E$ ) on rutile  $\text{TiO}_2(110)$ , and  $\text{Ir}_1\text{-TiO}_2(110)$ , and  $\text{Pt}_1\text{-TiO}_2(110)$  for different functionals.

| Functional        | Energetics       | $\text{TiO}_2$ | $\text{Ir}_1\text{-TiO}_2$ | $\text{Pt}_1\text{-TiO}_2$ |
|-------------------|------------------|----------------|----------------------------|----------------------------|
| <b>PBE</b>        | $E_{\text{ads}}$ | -0.10          | -0.51                      | -0.62                      |
|                   | $E_{\text{a}}$   | 0.87           | 0.23                       | 0.15                       |
|                   | $\Delta E$       | -0.02          | -1.63                      | -2.24                      |
| <b>PBE-D3</b>     | $E_{\text{Ads}}$ | -0.39          | -0.83                      | -0.95                      |
|                   | $E_{\text{a}}$   | 0.82           | 0.21                       | 0.13                       |
|                   | $\Delta E$       | -0.05          | -1.60                      | -2.22                      |
| <b>optPBE-vdW</b> | $E_{\text{Ads}}$ | -0.37          | -0.75                      | -0.84                      |
|                   | $E_{\text{a}}$   | 0.95           | 0.30                       | 0.19                       |
|                   | $\Delta E$       | -0.04          | -1.64                      | -2.27                      |
| <b>SCAN</b>       | $E_{\text{ads}}$ | -0.04          | -0.76                      | -0.96                      |
|                   | $E_{\text{a}}^*$ | 0.96           | 0.28                       | 0.19                       |
|                   | $\Delta E$       | 0.19           | -1.68                      | -2.28                      |
| <b>HSE06*</b>     | $E_{\text{ads}}$ | -0.28          | -0.48                      | -0.92                      |
|                   | $E_{\text{a}}$   | 1.03           | 0.12                       | 0.25                       |
|                   | $\Delta E$       | -0.09          | -2.09                      | -2.48                      |

\*Single point energies.
